# Supplementary material for: Insulin-like Growth Factor-1 and mTORC1 Signaling Promote the Intestinal Regenerative Response After Irradiation Injury
Source: PubMed Central journal article supplement — Cell Mol Gastroenterol Hepatol. 2020 Jun 2;10(4):797–810. doi: 10.1016/j.jcmgh.2020.05.013 (PMC7502577; doi:10.1016/j.jcmgh.2020.05.013), 2020-06-02
Supplement: mmc1.pdf [file mmc1.pdf]

# **Insulin-like Growth Factor-1 and mTORC1 Signaling Promote the Intestinal Regenerative Response after Irradiation Injury**

Natacha Bohin<sup>1,2</sup>, Kevin P. McGowan<sup>1</sup>, Theresa M. Keeley<sup>1</sup>, Elizabeth A. Carlson<sup>1</sup>, Kelley S. Yan<sup>3</sup> and Linda C. Samuelson<sup>1,2\*</sup>

<sup>1</sup>Department of Molecular & Integrative Physiology and <sup>2</sup>Cellular & Molecular Biology Graduate Program, University of Michigan, Ann Arbor, MI 48109, USA; <sup>3</sup>Columbia Center for Human Development, Columbia Stem Cell Initiative, Departments of Medicine and Genetics & Development, Columbia University Irving Medical Center, New York, NY 10032, USA

## **SUPPLEMENTARY MATERIAL**

### **Index:**

**Appendix Table 1.** RNA array comparison between the normalized cycle threshold (Ct) values of 84 growth factor genes from UNIIR and 48 HPI samples

**Appendix Table 2.** RNA array comparison between the normalized cycle threshold (Ct) values of 84 growth factor genes from UNIIR and 4 DPI samples

**Appendix Table 3.** RNA array comparison between the normalized cycle threshold (Ct) values of 84 growth factor genes from UNIIR and 6 DPI samples

Appendix Table 1: RNA array comparison between the normalized cycle threshold (Ct) values of 84 growth factor genes from UNIIR and 48 HPI samples

| GeneBank  | Symbol | Description                                 | logFC        | AveExpr     | t            | P.Value     | adj.P.Val   | Mock Irradiated |                |                | 48 Hours       |                |                |
|-----------|--------|---------------------------------------------|--------------|-------------|--------------|-------------|-------------|-----------------|----------------|----------------|----------------|----------------|----------------|
|           |        |                                             |              |             |              |             |             | PAMM041 Plate1  | PAMM041 Plate2 | PAMM041 Plate3 | PAMM041 Plate1 | PAMM041 Plate2 | PAMM041 Plate3 |
| NM_011313 | S100a6 | S100 calcium binding protein A6 (calcyclin) | -2.856300133 | 1.070665867 | -12.06377148 | 2.15E-07    | 1.68E-05    | 3.0630376       | 2.9841846      | 3.0664342      | -0.1488696     | 0.1112968      | 0.5823288      |
| NM_007950 | Ereg   | Epiregulin                                  | -3.654474133 | 4.985225867 | -9.52486492  | 2.02E-06    | 7.89E-05    | 7.8766046       | 6.4867596      | 6.9011292      | 3.3549354      | 3.2953638      | 3.6507718      |
| NM_007559 | Bmp8b  | Bone morphogenetic protein 8b               | -2.797479133 | 9.759587367 | -8.582421077 | 5.29E-06    | 0.000137505 | 10.6243746      | 10.3265996     | 11.5622702     | 8.1376504      | 7.7460718      | 8.2370848      |
| NM_010512 | Igf1   | Insulin-like growth factor 1                | -1.9160684   | 5.169512527 | -7.359306956 | 3.65E-05    | 0.000712242 | NA              | 6.2589006      | 6.6587702      | 4.3446264      | 4.4112368      | 4.8724378      |
| NM_198190 | Ntf5   | Neurotrophin 5                              | -2.492264467 | 12.3053502  | -6.35908881  | 7.32E-05    | 0.001141469 | 14.4148456      | 13.7942406     | 12.8395372     | 10.9308274     | 11.1166828     | 11.5243198     |
| NM_007557 | Bmp7   | Bone morphogenetic protein 7                | -1.182783133 | 7.304668867 | -6.040466053 | 0.000111969 | 0.001455595 | 7.9223216       | 7.3297156      | 7.7227622      | 6.4271424      | 6.5605168      | 6.4387908      |
| NM_008176 | Cxcl1  | Chemokine (C-X-C motif) ligand 1            | -3.248444133 | 10.74938437 | -5.057454797 | 0.000454332 | 0.005062556 | 13.3940856      | 12.1514456     | 12.0477552     | 8.5399404      | 8.9788668      | 10.3291468     |
| NM_008006 | Fgf2   | Fibroblast growth factor 2                  | -1.705751133 | 8.78776095  | -4.870034498 | 0.000602709 | 0.005876409 | 10.1883416      | 9.2035826      | 9.1711342      | 7.4714824      | 7.5737088      | 8.4006138      |
| NM_010427 | Hgf    | Hepatocyte growth factor                    | -1.410369067 | 7.523043345 | -4.857469255 | 0.000824909 | 0.00714921  | NA              | 7.6953736      | 8.4841492      | 6.5159764      | 6.7879898      | 6.7342108      |
| NM_008380 | Inhba  | Inhibin beta-A                              | -2.147391133 | 9.12383295  | -4.402650467 | 0.001246289 | 0.008837323 | 10.5211856      | 8.7307816      | 11.0667442     | 7.7877774      | 7.8551908      | 8.2335698      |
| NM_008381 | Inhbb  | Inhibin beta-B                              | -1.731224133 | 9.220747617 | -4.439740637 | 0.001175156 | 0.008837323 | 10.5652196      | 9.9916646      | 9.9804662      | 8.0176224      | 8.2352518      | 9.0908038      |
| NM_011562 | Tgdf1  | Teratocarcinoma-derived growth factor 1     | -5.638162433 | 16.71278144 | -4.931942123 | 0.001513271 | 0.009119166 | 20.3083686      | 19.8610076     | NA             | 14.5236994     | 14.8877538     | 13.9281238     |
| NM_009368 | Tgfb3  | Transforming growth factor, beta 3          | -0.8728348   | 8.327371783 | -4.278272874 | 0.001519861 | 0.009119166 | 9.0148256       | 8.5242746      | 8.6612152      | 7.7236964      | 7.6856888      | 8.1724258      |
| NM_009711 | Artn   | Artemin                                     | -1.0797568   | 9.52028395  | -4.208182905 | 0.001701259 | 0.009478441 | 10.2639236      | 9.6049026      | 9.9281242      | 8.8764214      | 8.8420558      | 8.8392028      |
| NM_008005 | Fgf18  | Fibroblast growth factor 18                 | -1.841283467 | 12.19765912 | -4.094907674 | 0.0020441   | 0.010629319 | 13.3401656      | 12.8539406     | 12.0933502     | 10.5537974     | 11.3214388     | 10.8883698     |
| NM_010200 | Fgf13  | Fibroblast growth factor 13                 | -1.023777467 | 8.592814033 | -3.897998002 | 0.002823535 | 0.012955041 | 8.8751626       | 8.5336686      | 8.8122092      | 7.5250804      | 7.6431268      | 7.9815008      |
| NM_011697 | Vegfb  | Vascular endothelial growth factor B        | 0.776485533  | 7.4733892   | 3.904508557  | 0.002793324 | 0.012955041 | 7.3712026       | 7.5055296      | 6.9793652      | 8.1422794      | 8.0513108      | 7.9919638      |
| NM_007540 | Bdnf   | Brain derived neurotrophic factor           | -2.250070467 | 11.88260395 | -3.811830928 | 0.003257092 | 0.013371218 | 12.6153106      | 13.5828136     | 13.1313542     | 9.6960704      | 10.7225598     | 12.1606368     |
| NM_008361 | Il1b   | Interleukin 1 beta                          | -1.928392133 | 8.0152477   | -3.837996236 | 0.003118544 | 0.013371218 | 9.1403526       | 7.2444306      | 7.9650722      | 6.1277164      | 5.7024638      | 6.7344988      |
| NM_008003 | Fgf15  | Fibroblast growth factor 15                 | -3.399312133 | 15.90422212 | -3.635582164 | 0.004373888 | 0.017058162 | 18.8327256      | 15.2081336     | 18.7683662     | 14.3071594     | 14.2959838     | 14.0081458     |
| NM_008350 | Il11   | Interleukin 11                              | -1.9242938   | 11.42749745 | -3.541601097 | 0.005125421 | 0.019037278 | 13.4814356      | 12.0462936     | 11.6978712     | 10.8453724     | 9.6356288      | 10.9717178     |
| NM_023304 | Fgf22  | Fibroblast growth factor 22                 | -1.203174467 | 11.97653078 | -3.366450296 | 0.006903153 | 0.024388971 | 12.7242316      | 12.8126376     | 11.6822042     | 10.7065134     | 11.7846838     | 11.1183528     |
| NM_008007 | Fgf3   | Fibroblast growth factor 3                  | -1.5357288   | 13.8697248  | -3.695777515 | 0.00719162  | 0.024388971 | 14.0930906      | 15.3398366     | 14.4587422     | 12.7679754     | 13.1079838     | 13.4085238     |
| NM_007778 | Csf1   | Colony stimulating factor 1 (macrophage)    | -0.896353467 | 7.640046867 | -3.095373286 | 0.010997186 | 0.035740853 | 8.3771456       | 7.2941266      | 7.5068442      | 6.5301614      | 6.7558028      | 7.2030918      |
| NM_173404 | Bmp3   | Bone morphogenetic protein 3                | 0.9908942    | 6.965816283 | 3.0267739    | 0.012381408 | 0.035768511 | 6.9570366       | 6.1405106      | 7.2540622      | 7.6435534      | 7.6990748      | 7.9816638      |
| NM_177099 | Lefty2 | Left-right determination factor 2           | -3.4432986   | 17.96781106 | -3.759399992 | 0.01193627  | 0.035768511 | NA              | 18.6455386     | 17.5709482     | NA             | 14.6649448     | NA             |
| NM_009367 | Tgfb2  | Transforming growth factor, beta 2          | -0.847642133 | 8.8581462   | -3.06690057  | 0.011551543 | 0.035768511 | 9.2531686       | 8.7206876      | 8.9670022      | 7.9029814      | 8.3318368      | 8.1631138      |
| NM_008501 | Lif    | Leukemia inhibitory factor                  | -0.6475608   | 8.660766617 | -2.856112886 | 0.016642419 | 0.046361025 | 9.0229606       | 8.3931566      | 8.8827652      | 8.2510534      | 7.8959628      | 8.2091838      |
| NM_008827 | Pgf    | Placental growth factor                     | -1.024631467 | 9.671740617 | -2.798181457 | 0.018403127 | 0.049498065 | 10.5762326      | 9.6847136      | 9.9495492      | 9.0016854      | 8.9742118      | 9.1607038      |
| NM_013609 | Ngf    | Nerve growth factor                         | -1.077093567 | 12.25852698 | -2.604529305 | 0.027860182 | 0.072436474 | NA              | 12.8177566     | 13.0810692     | 11.4823524     | 11.5930088     | 12.5415968     |
| NM_007554 | Bmp4   | Bone morphogenetic protein 4                | -0.502244133 | 5.530883367 | -2.43464192  | 0.034571663 | 0.086986765 | 5.6185626       | 5.2013416      | 5.4223182      | 4.8169994      | 4.8395038      | 5.0789868      |
| NM_008008 | Fgf7   | Fibroblast growth factor 7                  | -0.755276467 | 8.584481283 | -2.406915063 | 0.036267728 | 0.088402587 | 9.0568086       | 7.9820726      | 8.3035972      | 7.9832504      | 7.6949148      | 7.3984838      |
| NM_010216 | Figf   | C-fos induced growth factor                 | -0.702217467 | 8.76661645  | -2.30926491  | 0.042912965 | 0.101430645 | 9.4802056       | 8.4658226      | 9.1185672      | 8.2767854      | 8.2786518      | 8.4025058      |
| NM_007556 | Bmp6   | Bone morphogenetic protein 6                | -0.666260133 | 8.844636783 | -2.197131107 | 0.052004475 | 0.119304384 | 9.3180386       | 8.3203026      | 8.9154822      | 8.2285124      | 8.0995148      | 8.2270158      |
| NM_008002 | Fgf10  | Fibroblast growth factor 10                 | -1.044521467 | 9.978682783 | -2.160053796 | 0.055399206 | 0.123461088 | 11.2574046      | 9.5859006      | 9.8687822      | 8.8999644      | 9.0210428      | 9.6575158      |
| NM_009755 | Bmp1   | Bone morphogenetic protein 1                | -0.5712648   | 6.8769237   | -2.134469369 | 0.057864287 | 0.125372623 | 7.0603256       | 6.3236306      | 7.0829282      | 6.4128564      | 6.4677518      | 5.8724818      |

Appendix Table 1: RNA array comparison between the normalized cycle threshold (Ct) values of 84 growth factor genes from UNIIR and 48 HPI samples

|           |        |                                                 |              |             |              |             |             |            |            |            |            |            |            |
|-----------|--------|-------------------------------------------------|--------------|-------------|--------------|-------------|-------------|------------|------------|------------|------------|------------|------------|
| NM_053009 | Zfp91  | Zinc finger protein 91                          | 0.3820752    | 2.9857062   | 2.069606434  | 0.06459112  | 0.136165064 | 3.1982956  | 2.6738356  | 2.9852802  | 3.4252724  | 3.3919728  | 3.1863918  |
| NM_010113 | Egf    | Epidermal growth factor                         | -0.727421467 | 10.77793162 | -2.00703274  | 0.071778059 | 0.137082977 | 11.1442206 | 10.8136886 | 11.2250072 | 10.2468084 | 9.7512268  | 11.0026168 |
| NM_010514 | Igf2   | Insulin-like growth factor 2                    | -0.421933233 | 10.18495798 | -2.051964277 | 0.069474205 | 0.137082977 | NA         | 9.7744106  | 9.8800972  | 9.3983774  | 9.5484328  | 9.2691518  |
| NM_010554 | Il1a   | Interleukin 1 alpha                             | -1.093837467 | 8.893557367 | -2.004729826 | 0.072056436 | 0.137082977 | 9.3563216  | 9.1697366  | 9.0616982  | 9.3344714  | 6.9118398  | 8.0599328  |
| NM_031168 | Il6    | Interleukin 6                                   | -1.4175554   | 11.67697153 | -2.050139571 | 0.069681673 | 0.137082977 | NA         | 12.2604506 | 12.0721942 | 11.4719134 | 10.1521388 | 10.6222488 |
| NM_009263 | Spp1   | Secreted phosphoprotein 1                       | -1.8386458   | 7.8554667   | -1.986354432 | 0.07431431  | 0.13801229  | 9.9680006  | 8.4657956  | 9.1258262  | 6.4274564  | 6.6271578  | 8.9890708  |
| NM_011577 | Tgfb1  | Transforming growth factor, beta 1              | -0.4749818   | 5.655222283 | -1.945493249 | 0.07957516  | 0.144345639 | 6.1353986  | 5.2322026  | 5.3020142  | 4.9267414  | 5.0680148  | 5.2499138  |
| NM_008360 | Il18   | Interleukin 18                                  | 0.474545533  | 1.433462283 | 1.726612455  | 0.114132454 | 0.202325714 | 1.3350986  | 0.5841806  | 1.0940462  | 1.5458234  | 1.8349368  | 1.0562018  |
| NM_009971 | Csf3   | Colony stimulating factor 3 (granulocyte)       | -2.4318558   | 13.82481198 | -1.710332265 | 0.120376205 | 0.208652089 | 16.3707856 | 14.7968256 | 13.5958202 | 12.0105824 | 12.1954358 | 13.2618458 |
| NM_010094 | Lefty1 | Left right determination factor 1               | 0.386938867  | 8.5232862   | 1.553510902  | 0.150542284 | 0.255267351 | 8.5418916  | 8.1262766  | 7.8896622  | 8.7489894  | 8.5898948  | 8.3797628  |
| NM_007553 | Bmp2   | Bone morphogenetic protein 2                    | -0.458637133 | 6.18948745  | -1.501063428 | 0.163433135 | 0.271229458 | 5.5538156  | 5.5971856  | 6.5640362  | 5.3441494  | 5.3456048  | 5.6493718  |
| NM_008808 | Pdgfa  | Platelet derived growth factor, alpha           | -0.417913133 | 6.65306195  | -1.43181896  | 0.181909254 | 0.295602538 | 7.1911226  | 6.3190366  | 6.3524622  | 6.1714654  | 6.2973168  | 6.1400998  |
| NM_009362 | Tff1   | Trefoil factor 1                                | -1.7639448   | 10.93600145 | -1.377980704 | 0.19748101  | 0.30202978  | 11.3064826 | 12.3240246 | 15.4074662 | 11.0844234 | 11.5227018 | 11.1390138 |
| NM_031199 | Tgfa   | Transforming growth factor alpha                | -0.231869133 | 7.220880617 | -1.383401853 | 0.195863676 | 0.30202978  | 7.4941846  | 7.3697266  | 7.4511782  | 7.0632814  | 7.3624548  | 7.1937458  |
| NM_009505 | Vegfa  | Vascular endothelial growth factor A            | -0.313914467 | 3.838946117 | -1.392913708 | 0.193052919 | 0.30202978  | 3.9847886  | 3.3746376  | 3.7957642  | 3.2017734  | 3.3136438  | 3.6980298  |
| NM_010272 | Gdf11  | Growth differentiation factor 11                | 0.386884933  | 9.077986527 | 1.270368584  | 0.234899428 | 0.352349142 | NA         | 8.6629276  | 8.5397232  | 8.7409024  | 9.0295648  | 9.1941638  |
| NM_007555 | Bmp5   | Bone morphogenetic protein 5                    | -0.281315467 | 5.8139917   | -1.184451902 | 0.26291307  | 0.372858536 | 5.8051126  | 5.0782476  | 5.6098372  | 5.3557534  | 5.2910168  | 5.0024808  |
| NM_010197 | Fgf1   | Fibroblast growth factor 1                      | -0.387265133 | 8.064896117 | -1.190776959 | 0.260527869 | 0.372858536 | 8.6988466  | 7.4211386  | 8.2531592  | 7.3763644  | 7.8953218  | 7.9396628  |
| NM_010275 | Gdnf   | Glial cell line derived neurotrophic factor     | -0.560932133 | 9.8568922   | -1.1980575   | 0.257803716 | 0.372858536 | 10.9995856 | 9.0196806  | 9.3310132  | 9.1154124  | 9.5006268  | 9.0514438  |
| NM_021704 | Cxcl12 | Chemokine (C-X-C motif) ligand 12               | -0.2458019   | 5.654867982 | -1.142644924 | 0.281828702 | 0.39254712  | NA         | 5.4173466  | 5.9094592  | 5.4118524  | 5.4238348  | 5.4171158  |
| NM_008109 | Gdf5   | Growth differentiation factor 5                 | -0.7064928   | 14.50696255 | -1.318606439 | 0.304427919 | 0.416585574 | NA         | 14.3433456 | NA         | NA         | 13.6368528 | NA         |
| NM_010202 | Fgf4   | Fibroblast growth factor 4                      | -0.992262133 | 13.15846671 | -1.066601688 | 0.313132251 | 0.42110889  | 15.7587056 | 12.0835286 | 11.9845432 | 12.2450684 | 12.5256838 | 12.0792388 |
| NM_010784 | Mdk    | Midkine                                         | -0.2771218   | 7.14173445  | -1.039685235 | 0.322336803 | 0.42614018  | 7.2993646  | 6.7121356  | 7.3918062  | 7.1208794  | 6.7918078  | 6.6592538  |
| NM_010205 | Fgf8   | Fibroblast growth factor 8                      | -0.677095133 | 15.13678162 | -1.011653614 | 0.334937242 | 0.435418414 | 14.4513626 | 14.0275456 | 16.5623042 | 14.1172294 | 14.1458168 | 14.7468808 |
| NM_013611 | Nodal  | Nodal                                           | -0.4304644   | 13.95672689 | -0.770377969 | 0.465358723 | 0.595048859 | NA         | 15.0232966 | 13.4918702 | 14.4212614 | 13.5650798 | 13.4950158 |
| NM_009969 | Csf2   | Colony stimulating factor 2                     | -0.327836133 | 11.28337253 | -0.720869648 | 0.487069673 | 0.603692874 | 11.0947516 | 9.8922346  | 11.6219092 | 10.7593044 | 10.4718948 | 10.3941878 |
| NM_010203 | Fgf5   | Fibroblast growth factor 5                      | -0.9662417   | 15.40041338 | -0.731099527 | 0.487598091 | 0.603692874 | 15.4313276 | 18.8508646 | 13.6415922 | 14.4210674 | 15.5956388 | NA         |
| NM_007558 | Bmp8a  | Bone morphogenetic protein 8a                   | -0.161451467 | 7.019420283 | -0.648677419 | 0.530779268 | 0.64398441  | 6.4508076  | 6.0825956  | 6.8750462  | 6.2589254  | 6.4072528  | 6.2579168  |
| NM_008742 | Ntf3   | Neurotrophin 3                                  | -0.202740467 | 8.184056367 | -0.639248794 | 0.536653675 | 0.64398441  | 8.0675716  | 7.1573656  | 7.9336382  | 7.5633794  | 7.4024378  | 7.5845368  |
| NM_008371 | Il7    | Interleukin 7                                   | 0.140327433  | 8.0910868   | 0.576041435  | 0.578297736 | 0.683442778 | NA         | 8.3388656  | 7.9094442  | 8.2243494  | 8.3641568  | 8.2049408  |
| NM_019400 | Rabep1 | Rabaptin, RAB GTPase binding effector protein 1 | 0.093039533  | 5.6005022   | 0.483077241  | 0.639170686 | 0.744109156 | 5.4960156  | 5.1741256  | 5.7678192  | 5.4335124  | 5.7314028  | 5.5521638  |
| NM_007445 | Amh    | Anti-Mullerian hormone                          | -0.4063938   | 17.11161137 | -0.441737054 | 0.66783286  | 0.750731565 | 15.5812986 | 18.2167106 | 19.0645092 | 18.5523234 | 17.1921968 | 15.8988168 |
| NM_008004 | Fgf17  | Fibroblast growth factor 17                     | -0.3828441   | 16.06200877 | -0.465288617 | 0.664455207 | 0.750731565 | NA         | NA         | 16.0067922 | 14.8832524 | 16.3646438 | NA         |
| NM_008351 | Il12a  | Interleukin 12A                                 | 0.462065533  | 13.99847037 | 0.433328814  | 0.673733456 | 0.750731565 | 14.1011056 | 11.8219306 | 12.2802152 | 13.1741414 | 12.3459328 | 14.0693738 |
| NM_010198 | Fgf11  | Fibroblast growth factor 11                     | 0.101544867  | 8.684428533 | 0.309755191  | 0.762939187 | 0.838158543 | 8.3578896  | 7.9281556  | 8.0225572  | 7.8349984  | 8.2972308  | 8.4810078  |
| NM_009506 | Vegfc  | Vascular endothelial growth factor C            | -0.051279467 | 9.746123117 | -0.235766265 | 0.818247834 | 0.886435154 | 9.7035556  | 9.3963526  | 9.5647672  | 9.3971664  | 9.5304628  | 9.5832078  |
| NM_021283 | Il4    | Interleukin 4                                   | -0.170447733 | 12.0533028  | -0.21760744  | 0.83244792  | 0.8894649   | NA         | 11.4042666 | 11.4354522 | 11.4158414 | 12.1231398 | 10.2092538 |
| NM_010564 | Inha   | Inhibin alpha                                   | -0.0570694   | 11.07142589 | -0.139170392 | 0.89229121  | 0.934919022 | NA         | 10.7289126 | 10.4156122 | 9.8185994  | 10.5156168 | 11.2113628 |

Appendix Table 1: RNA array comparison between the normalized cycle threshold (Ct) values of 84 growth factor genes from UNIIR and 48 HPI samples

|           |       |                                  |              |             |             |             |             |            |            |            |            |            |            |
|-----------|-------|----------------------------------|--------------|-------------|-------------|-------------|-------------|------------|------------|------------|------------|------------|------------|
| NM_013598 | Kitl  | Kit ligand                       | 0.0586592    | 3.753494867 | 0.130150508 | 0.898960598 | 0.934919022 | 3.7911376  | 3.2883876  | 3.6808272  | 3.4788894  | 3.6081468  | 3.8492938  |
| NM_013518 | Fgf9  | Fibroblast growth factor 9       | 0.026822867  | 11.1144902  | 0.098284028 | 0.923598046 | 0.935592826 | 10.4335766 | 10.5219786 | 10.4836972 | 10.7245544 | 10.7038828 | 10.0912838 |
| NM_145741 | Gdf10 | Growth differentiation factor 10 | 0.0848592    | 12.08812053 | 0.105427995 | 0.918066384 | 0.935592826 | 13.0936396 | 10.6253356 | 10.8201742 | 11.4158844 | 12.1902938 | 11.1875488 |
| NM_010201 | Fgf14 | Fibroblast growth factor 14      | -0.018560467 | 9.910584867 | -0.06622786 | 0.948467583 | 0.948467583 | 10.6179506 | 10.1717016 | 10.4141682 | 10.0998634 | 11.0542688 | 9.9940068  |
| NM_009756 | Bmp10 | Bone morphogenetic protein 10    | NA           | 14.3355976  | NA          | NA          | NA          | NA         | NA         | NA         | NA         | NA         | 14.2154598 |
| NM_010204 | Fgf6  | Fibroblast growth factor 6       | NA           | 17.3500847  | NA          | NA          | NA          | NA         | NA         | NA         | NA         | NA         | 19.9700298 |
| NM_008366 | Il2   | Interleukin 2                    | NA           | 14.61257653 | NA          | NA          | NA          | NA         | NA         | 14.4339402 | NA         | 13.5979628 | 13.7241438 |
| NM_010556 | Il3   | Interleukin 3                    | NA           | 14.34337152 | NA          | NA          | NA          | NA         | NA         | 14.5231272 | 15.1948744 | 14.7029568 | 14.5363838 |
| NM_008493 | Lep   | Leptin                           | NA           | 19.7642197  | NA          | NA          | NA          | NA         | NA         | NA         | NA         | 19.0965168 | NA         |
| NM_010834 | Mstn  | Myostatin                        | NA           | 15.6276996  | NA          | NA          | NA          | NA         | 16.3117006 | NA         | NA         | NA         | NA         |

Appendix Table 2: RNA array comparison between the normalized cycle threshold (Ct) values of 84 growth factor genes from UNIIR and 4 DPI samples

| GeneBank  | Symbol | Description                                          | logFC        | AveExpr     | t            | P.Value     | adj.P.Val   | Mock Irradiated |                |                | 4 Days         |                |                |
|-----------|--------|------------------------------------------------------|--------------|-------------|--------------|-------------|-------------|-----------------|----------------|----------------|----------------|----------------|----------------|
|           |        |                                                      |              |             |              |             |             | PAMM041 Plate1  | PAMM041 Plate2 | PAMM041 Plate3 | PAMM041 Plate1 | PAMM041 Plate2 | PAMM041 Plate3 |
| NM_011313 | S100a6 | S100 calcium binding protein A6 (calcyclin)          | -3.56087     | 1.070665867 | -15.03956865 | 2.50E-08    | 1.95E-06    | 3.0630376       | 2.9841846      | 3.0664342      | -0.7994798     | -0.3002294     | -0.4692444     |
| NM_007950 | Ereg   | Epiregulin                                           | -3.699359667 | 4.985225867 | -9.641852653 | 1.81E-06    | 7.05E-05    | 7.8766046       | 6.4867596      | 6.9011292      | 3.0734792      | 3.8420966      | 3.2508386      |
| NM_013518 | Fgf9   | Fibroblast growth factor 9                           | 2.014945333  | 11.1144902  | 7.383138667  | 2.03E-05    | 0.000396755 | 10.4335766      | 10.5219786     | 10.4836972     | 12.8134372     | 12.2057716     | 12.4648796     |
| NM_010512 | Igf1   | Insulin-like growth factor 1                         | -2.0662326   | 5.169512527 | -7.936063215 | 1.98E-05    | 0.000396755 | NA              | 6.2589006      | 6.6587702      | 4.1628152      | 4.3657296      | 4.6492636      |
| NM_007559 | Bmp8b  | Bone morphogenetic protein 8b                        | -2.308634667 | 9.759587367 | -7.082689049 | 2.92E-05    | 0.000455986 | 10.6243746      | 10.3265996     | 11.5622702     | 8.3924532      | 8.6936286      | 8.5012586      |
| NM_198190 | Ntf5   | Neurotrophin 5                                       | -2.547395333 | 12.3053502  | -6.499756898 | 6.09E-05    | 0.000791702 | 14.4148456      | 13.7942406     | 12.8395372     | 10.8761622     | 11.5732326     | 10.9570426     |
| NM_007558 | Bmp8a  | Bone morphogenetic protein 8a                        | 1.411386     | 7.019420283 | 5.670646706  | 0.000186652 | 0.002079834 | 6.4508076       | 6.0825956      | 6.8750462      | 8.0272492      | 7.5417696      | 8.0735886      |
| NM_010198 | Fgf11  | Fibroblast growth factor 11                          | 1.435928333  | 8.684428533 | 4.380194393  | 0.001291551 | 0.011115048 | 8.3578896       | 7.9281556      | 8.0225572      | 10.0598112     | 9.2476296      | 9.3089466      |
| NM_010201 | Fgf14  | Fibroblast growth factor 14                          | -1.242139667 | 9.910584867 | -4.432229742 | 0.001189207 | 0.011115048 | 10.6179506      | 10.1717016     | 10.4141682     | 8.9723922      | 9.3021976      | 9.2028116      |
| NM_008360 | Il18   | Interleukin 18                                       | 1.18691      | 1.433462283 | 4.318518341  | 0.001425006 | 0.011115048 | 1.3350986       | 0.5841806      | 1.0940462      | 2.4938802      | 1.9257836      | 2.1543916      |
| NM_010427 | Hgf    | Hepatocyte growth factor                             | -1.279099267 | 7.523043345 | -4.40536134  | 0.001587992 | 0.011260308 | NA              | 7.6953736      | 8.4841492      | 6.6155292      | 7.1318486      | 6.6846086      |
| NM_008742 | Ntf3   | Neurotrophin 3                                       | 1.288358333  | 8.184056367 | 4.062245317  | 0.002155889 | 0.014013281 | 8.0675716       | 7.1573656      | 7.9336382      | 9.5781922      | 8.5748416      | 8.8706166      |
| NM_009505 | Vegfa  | Vascular endothelial growth factor A                 | 0.886671333  | 3.838946117 | 3.934373168  | 0.002659011 | 0.015954064 | 3.9847886       | 3.3746376      | 3.7957642      | 4.8134282      | 4.4538636      | 4.5479126      |
| NM_007540 | Bdnf   | Brain derived neurotrophic factor                    | -2.227817667 | 11.88260395 | -3.774132593 | 0.003468084 | 0.01690691  | 12.6153106      | 13.5828136     | 13.1313542     | 9.9437452      | 11.6444996     | 11.0577806     |
| NM_008176 | Cxcl1  | Chemokine (C-X-C motif) ligand 1                     | -2.438001    | 10.74938437 | -3.795687826 | 0.003345757 | 0.01690691  | 13.3940856      | 12.1514456     | 12.0477552     | 10.2097712     | 10.7834386     | 9.2860736      |
| NM_009362 | Tff1   | Trefoil factor 1                                     | -4.876003333 | 10.93600145 | -3.809097941 | 0.003271928 | 0.01690691  | 11.3064826      | 12.3240246     | 15.4074662     | 7.2505392      | 9.0230736      | 8.1363506      |
| NM_008350 | Il11   | Interleukin 11                                       | -2.001733333 | 11.42749745 | -3.684126077 | 0.004031387 | 0.018496954 | 13.4814356      | 12.0462936     | 11.6978712     | 9.6982872      | 11.1744726     | 10.3476406     |
| NM_010514 | Igf2   | Insulin-like growth factor 2                         | 0.770476567  | 10.18495798 | 3.747015561  | 0.004339918 | 0.018806309 | NA              | 9.7744106      | 9.8800972      | 10.3565112     | 10.7932386     | 10.6434416     |
| NM_008006 | Fgf2   | Fibroblast growth factor 2                           | -1.240967    | 8.78776095  | -3.543044459 | 0.005112921 | 0.020989885 | 10.1883416      | 9.2035826      | 9.1711342      | 8.0597152      | 8.4067146      | 8.3737276      |
| NM_007557 | Bmp7   | Bone morphogenetic protein 7                         | -0.657557667 | 7.304668867 | -3.358142884 | 0.007001808 | 0.024824593 | 7.9223216       | 7.3297156      | 7.7227622      | 6.7999652      | 7.0713926      | 7.1307686      |
| NM_009969 | Csf2   | Colony stimulating factor 2 (granulocyte-macrophage) | 1.552417333  | 11.28337253 | 3.41356679   | 0.006370047 | 0.024824593 | 11.0947516      | 9.8922346      | 11.6219092     | 11.8580392     | 12.2637966     | 13.1443116     |
| NM_008381 | Inhbb  | Inhibin beta-B                                       | -1.312911    | 9.220747617 | -3.366972657 | 0.006896997 | 0.024824593 | 10.5652196      | 9.9916646      | 9.9804662      | 8.8402092      | 9.5694896      | 8.1889186      |
| NM_008003 | Fgf15  | Fibroblast growth factor 15                          | -3.113243333 | 15.90422212 | -3.329630081 | 0.007351579 | 0.024931441 | 18.8327256      | 15.2081336     | 18.7683662     | 13.5276322     | 14.6396726     | 15.3021906     |
| NM_007555 | Bmp5   | Bone morphogenetic protein 5                         | 0.777132333  | 5.8139917   | 3.27204146   | 0.008113797 | 0.02636984  | 5.8051126       | 5.0782476      | 5.6098372      | 6.2793652      | 6.2776876      | 6.2675416      |
| NM_009263 | Spp1   | Secreted phosphoprotein 1                            | -2.54038     | 7.8554667   | -2.744462838 | 0.020202488 | 0.063031763 | 9.9680006       | 8.4657956      | 9.1258262      | 5.6302102      | 6.9731796      | 7.3350926      |
| NM_011562 | TdGF1  | Teratocarcinoma-derived growth factor 1              | -3.6323252   | 16.71278144 | -2.900510811 | 0.022023535 | 0.066070604 | 20.3083686      | 19.8610076     | NA             | 18.4612072     | 14.4435186     | NA             |
| NM_008351 | Il12a  | Interleukin 12A                                      | 2.731588333  | 13.99847037 | 2.561705749  | 0.027744613 | 0.080151105 | 14.1011056      | 11.8219306     | 12.2802152     | 13.9237282     | 18.3590996     | 14.1151886     |
| NM_008380 | Inhba  | Inhibin beta-A                                       | -1.193691    | 9.12383295  | -2.447343736 | 0.033820885 | 0.094215322 | 10.5211856      | 8.7307816      | 11.0667442     | 9.0241422      | 9.0577156      | 8.6557806      |
| NM_008008 | Fgf7   | Fibroblast growth factor 7                           | 0.717022667  | 8.584481283 | 2.285007853  | 0.044739046 | 0.120332606 | 9.0568086       | 7.9820726      | 8.3035972      | 9.0743702      | 9.2070506      | 9.2121256      |
| NM_007554 | Bmp4   | Bone morphogenetic protein 4                         | 0.461922333  | 5.530883367 | 2.239180912  | 0.04839627  | 0.121771259 | 5.6185626       | 5.2013416      | 5.4223182      | 6.2359032      | 5.6678986      | 5.7241876      |
| NM_009368 | Tgfb3  | Transforming growth factor, beta 3                   | -0.458053    | 8.327371783 | -2.245185143 | 0.04790116  | 0.121771259 | 9.0148256       | 8.5242746      | 8.6612152      | 8.1634182      | 8.2405996      | 8.4221386      |
| NM_013609 | Ngf    | Nerve growth factor                                  | -0.855243433 | 12.25852698 | -2.068071571 | 0.067668282 | 0.155244389 | NA              | 12.8177566     | 13.0810692     | 12.3888372     | 11.8325566     | 12.0611146     |
| NM_008808 | Pdgfa  | Platelet derived growth factor, alpha                | 0.602742     | 6.65306195  | 2.065064136  | 0.065089021 | 0.155244389 | 7.1911226       | 6.3190366      | 6.3524622      | 7.1366162      | 7.0616176      | 7.4726136      |
| NM_031199 | Tgfa   | Transforming growth factor alpha                     | -0.34226     | 7.220880617 | -2.042027377 | 0.067670631 | 0.155244389 | 7.4941846       | 7.3697266      | 7.4511782      | 7.1752852      | 7.0812556      | 7.0317686      |
| NM_145741 | Gdf10  | Growth differentiation factor 10                     | 1.594346     | 12.08812053 | 1.980795275  | 0.075010377 | 0.161507455 | 13.0936396      | 10.6253356     | 10.8201742     | 11.4664242     | 13.2716326     | 14.5841306     |
| NM_010564 | Inha   | Inhibin alpha                                        | 0.826628733  | 11.07142589 | 2.01583063   | 0.073694543 | 0.161507455 | NA              | 10.7289126     | 10.4156122     | 11.4994912     | 11.2107796     | 11.4864026     |
| NM_009506 | Vegfc  | Vascular endothelial growth factor C                 | 0.428082     | 9.746123117 | 1.968181432  | 0.076612511 | 0.161507455 | 9.7035556       | 9.3963526      | 9.5647672      | 10.3353682     | 9.6481926      | 9.9653606      |

Appendix Table 2: RNA array comparison between the normalized cycle threshold (Ct) values of 84 growth factor genes from UNIIR and 4 DPI samples

|           |        |                                                 |              |             |              |             |             |            |            |            |            |            |            |
|-----------|--------|-------------------------------------------------|--------------|-------------|--------------|-------------|-------------|------------|------------|------------|------------|------------|------------|
| NM_010216 | Fgf    | C-fos induced growth factor                     | -0.582496    | 8.76661645  | -1.915556985 | 0.083648132 | 0.171698798 | 9.4802056  | 8.4658226  | 9.1185672  | 8.1823392  | 8.2000076  | 8.9347606  |
| NM_009755 | Bmp1   | Bone morphogenetic protein 1                    | 0.502127     | 6.8769237   | 1.876143429  | 0.089306511 | 0.178613021 | 7.0603256  | 6.3236306  | 7.0829282  | 7.2259722  | 7.2023166  | 7.5449766  |
| NM_031168 | Il6    | Interleukin 6                                   | -1.1950876   | 11.67697153 | -1.728395504 | 0.116989607 | 0.228129734 | NA         | 12.2604506 | 12.0721942 | 10.8082452 | 11.5256046 | 10.5798546 |
| NM_009711 | Artn   | Artemin                                         | -0.373506667 | 9.52028395  | -1.455683696 | 0.175348747 | 0.3335903   | 10.2639236 | 9.6049026  | 9.9281242  | 9.4075852  | 9.4063476  | 9.8624976  |
| NM_007445 | Amh    | Anti-Mullerian hormone                          | -1.307486    | 17.11161137 | -1.421195435 | 0.184896454 | 0.342856345 | 15.5812986 | 18.2167106 | 19.0645092 | 15.3906752 | 17.3773566 | 16.1720286 |
| NM_008827 | Pgf    | Placental growth factor                         | -0.515139    | 9.671740617 | -1.40680083  | 0.189010549 | 0.342856345 | 10.5762326 | 9.6847136  | 9.9495492  | 9.4115592  | 9.6886466  | 9.5648726  |
| NM_053009 | Zfp91  | Zinc finger protein 91                          | -0.252052667 | 2.9857062   | -1.365306674 | 0.201306047 | 0.35686072  | 3.1982956  | 2.6738356  | 2.9852802  | 2.6924792  | 2.7182496  | 2.6905246  |
| NM_007553 | Bmp2   | Bone morphogenetic protein 2                    | 0.367467667  | 6.18948745  | 1.202676877  | 0.256087107 | 0.429449304 | 5.5538156  | 5.5971856  | 6.5640362  | 6.2096512  | 6.4398186  | 6.1679706  |
| NM_008002 | Fgf10  | Fibroblast growth factor 10                     | -0.571018333 | 9.978682783 | -1.18085684  | 0.264276495 | 0.429449304 | 11.2574046 | 9.5859006  | 9.8687822  | 8.8978812  | 10.2467376 | 9.8544136  |
| NM_008005 | Fgf18  | Fibroblast growth factor 18                     | -0.531974333 | 12.19765912 | -1.183080074 | 0.263432674 | 0.429449304 | 13.3401656 | 12.8539406 | 12.0933502 | 12.3315842 | 12.0880246 | 12.2719246 |
| NM_021283 | Il4    | Interleukin 4                                   | 0.960439067  | 12.0533028  | 1.22617463   | 0.250357571 | 0.429449304 | NA         | 11.4042666 | 11.4354522 | 12.2435122 | 11.5561686 | 13.3412146 |
| NM_010272 | Gdf11  | Growth differentiation factor 11                | 0.3507344    | 9.077986527 | 1.151665327  | 0.278285075 | 0.442984405 | NA         | 8.6629276  | 8.5397232  | 8.8979592  | 8.8209826  | 9.1372376  |
| NM_007778 | Csf1   | Colony stimulating factor 1 (macrophage)        | 0.324316333  | 7.640046867 | 1.119960096  | 0.288230693 | 0.449639882 | 8.3771456  | 7.2941266  | 7.5068442  | 8.2594312  | 7.9860486  | 7.9055856  |
| NM_011697 | Vegfb  | Vascular endothelial growth factor B            | -0.200353    | 7.4733892   | -1.007462431 | 0.336852242 | 0.515185782 | 7.3712026  | 7.5055296  | 6.9793652  | 7.1758832  | 6.9581246  | 7.1210306  |
| NM_010554 | Il1a   | Interleukin 1 alpha                             | -0.538575333 | 8.893557367 | -0.987073552 | 0.346283707 | 0.519425561 | 9.3563216  | 9.1697366  | 9.0616982  | 8.1080942  | 8.9302776  | 8.9336586  |
| NM_008007 | Fgf3   | Fibroblast growth factor 3                      | -0.443138867 | 13.8697248  | -0.953841308 | 0.370782401 | 0.545679761 | 14.0930906 | 15.3398366 | 14.4587422 | NA         | 13.6723226 | 14.7025126 |
| NM_173404 | Bmp3   | Bone morphogenetic protein 3                    | -0.287558333 | 6.965816283 | -0.878372341 | 0.399819076 | 0.565452207 | 6.9570366  | 6.1405106  | 7.2540622  | 6.0328112  | 7.0516706  | 6.4044526  |
| NM_009971 | Csf3   | Colony stimulating factor 3 (granulocyte)       | -1.264746    | 13.82481198 | -0.889500064 | 0.39622286  | 0.565452207 | 16.3707856 | 14.7968256 | 13.5958202 | 12.5078762 | 15.5937986 | 12.8675186 |
| NM_010205 | Fgf8   | Fibroblast growth factor 8                      | 0.579986667  | 15.13678162 | 0.866563026  | 0.405965687 | 0.565452207 | 14.4513626 | 14.0275456 | 16.5623042 | 14.5930202 | 16.2253366 | 15.9628156 |
| NM_008004 | Fgf17  | Fibroblast growth factor 17                     | 0.770063     | 16.06200877 | 0.810508097  | 0.460378977 | 0.629992284 | NA         | NA         | 16.0067922 | 16.7768552 | NA         | NA         |
| NM_013611 | Nodal  | Nodal                                           | -0.4552403   | 13.95672689 | -0.743732384 | 0.480369938 | 0.644677566 | NA         | 15.0232966 | 13.4918702 | NA         | 13.2325276 | 14.3721586 |
| NM_019400 | Rabep1 | Rabaptin, RAB GTPase binding effector protein 1 | 0.138651333  | 5.6005022   | 0.719901542  | 0.487640723 | 0.644677566 | 5.4960156  | 5.1741256  | 5.7678192  | 5.5732922  | 5.6243156  | 5.6563066  |
| NM_010113 | Egf    | Epidermal growth factor                         | -0.238605667 | 10.77793162 | -0.658338263 | 0.52479934  | 0.682239142 | 11.1442206 | 10.8136886 | 11.2250072 | 11.1537882 | 10.1876056 | 11.1257056 |
| NM_177099 | Lefty2 | Left-right determination factor 2               | -0.4914335   | 17.96781106 | -0.657134453 | 0.538692991 | 0.688820546 | NA         | 18.6455386 | 17.5709482 | 18.5973272 | 16.6362926 | NA         |
| NM_010094 | Lefty1 | Left right determination factor 1               | 0.153886     | 8.5232862   | 0.617832943  | 0.550135428 | 0.692105861 | 8.5418916  | 8.1262766  | 7.8896622  | 8.4090092  | 8.2237096  | 8.3867696  |
| NM_007556 | Bmp6   | Bone morphogenetic protein 6                    | 0.179723     | 8.844636783 | 0.592673904  | 0.566216118 | 0.701029479 | 9.3180386  | 8.3203026  | 8.9154822  | 9.0245412  | 9.1163086  | 8.9521426  |
| NM_008371 | Il7    | Interleukin 7                                   | -0.125601767 | 8.0910868   | -0.515592854 | 0.618205348 | 0.753437768 | NA         | 8.3388656  | 7.9094442  | 8.0528512  | 7.9798646  | 7.9629436  |
| NM_011577 | Tgfb1  | Transforming growth factor, beta 1              | 0.11987      | 5.655222283 | 0.490979393  | 0.633759967 | 0.760511961 | 6.1353986  | 5.2322026  | 5.3020142  | 5.5805612  | 5.7687156  | 5.6799486  |
| NM_008361 | Il1b   | Interleukin 1 beta                              | 0.214514333  | 8.0152477   | 0.426938686  | 0.678233358 | 0.797831134 | 9.1403526  | 7.2444306  | 7.9650722  | 8.3937792  | 8.7329756  | 7.8666436  |
| NM_008501 | Lif    | Leukemia inhibitory factor                      | 0.094527     | 8.660766617 | 0.416918045  | 0.685316487 | 0.797831134 | 9.0229606  | 8.3931566  | 8.8827652  | 9.0407282  | 8.5653426  | 8.9763926  |
| NM_010202 | Fgf4   | Fibroblast growth factor 4                      | 0.310437667  | 13.15846671 | 0.33369543   | 0.746031573 | 0.843340039 | 15.7587056 | 12.0835286 | 11.9845432 | 14.6997782 | 13.1345356 | 12.9237766 |
| NM_008109 | Gdf5   | Growth differentiation factor 5                 | 0.1980426    | 14.50696255 | 0.369629029  | 0.743298899 | 0.843340039 | NA         | 14.3433456 | NA         | 14.5413882 | NA         | NA         |
| NM_010203 | Fgf5   | Fibroblast growth factor 5                      | -0.4238794   | 15.40041338 | -0.320725165 | 0.757437972 | 0.844002311 | 15.4313276 | 18.8508646 | 13.6415922 | 15.5636512 | 15.5377796 | NA         |
| NM_010784 | Mdk    | Midkine                                         | 0.069794667  | 7.14173445  | 0.261850509  | 0.798612104 | 0.877348509 | 7.2993646  | 6.7121356  | 7.3918062  | 7.0937162  | 7.2065206  | 7.3124536  |
| NM_021704 | Cxcl12 | Chemokine (C-X-C motif) ligand 12               | -0.051308767 | 5.654867982 | -0.238516064 | 0.816668381 | 0.88472408  | NA         | 5.4173466  | 5.9094592  | 5.4864912  | 5.7919026  | 5.5578886  |
| NM_013598 | Kitl   | Kit ligand                                      | 0.077338667  | 3.753494867 | 0.171595704  | 0.86708846  | 0.926478081 | 3.7911376  | 3.2883876  | 3.6808272  | 2.4931232  | 4.1888146  | 4.3104306  |
| NM_010197 | Fgf1   | Fibroblast growth factor 1                      | -0.040779    | 8.064896117 | -0.125388757 | 0.902635682 | 0.9514268   | 8.6988466  | 7.4211386  | 8.2531592  | 7.9792952  | 7.9601316  | 8.3113806  |
| NM_010200 | Fgf13  | Fibroblast growth factor 13                     | 0.018801333  | 8.592814033 | 0.071585439  | 0.944306322 | 0.956570041 | 8.8751626  | 8.5336686  | 8.8122092  | 8.7823912  | 8.3745446  | 9.1205086  |
| NM_023304 | Fgf22  | Fibroblast growth factor 22                     | 0.033272667  | 11.97653078 | 0.09309604   | 0.927617856 | 0.956570041 | 12.7242316 | 12.8126376 | 11.6822042 | 12.6812432 | 12.1661746 | 12.4714736 |
| NM_010275 | Gdnf   | Glial cell line derived neurotrophic factor     | 0.037863     | 9.8568922   | 0.080869054  | 0.937099907 | 0.956570041 | 10.9995856 | 9.0196806  | 9.3310132  | 10.2032612 | 9.6690566  | 9.5915506  |
| NM_009367 | Tgfb2  | Transforming growth factor, beta 2              | 0.007344     | 8.8581462   | 0.02657173   | 0.979310415 | 0.979310415 | 9.2531686  | 8.7206876  | 8.9670022  | 8.9693952  | 8.7022676  | 9.2912276  |

Appendix Table 2: RNA array comparison between the normalized cycle threshold (Ct) values of 84 growth factor genes from UNIIR and 4 DPI samples

|           |       |                               |    |             |    |    |    |    |            |            |            |            |            |
|-----------|-------|-------------------------------|----|-------------|----|----|----|----|------------|------------|------------|------------|------------|
| NM_009756 | Bmp10 | Bone morphogenetic protein 10 | NA | 14.3355976  | NA | NA | NA | NA | NA         | NA         | NA         | NA         | NA         |
| NM_010204 | Fgf6  | Fibroblast growth factor 6    | NA | 17.3500847  | NA | NA | NA | NA | NA         | NA         | NA         | NA         | NA         |
| NM_008366 | Il2   | Interleukin 2                 | NA | 14.61257653 | NA | NA | NA | NA | NA         | 14.4339402 | 14.9101972 | 15.7739666 | 15.2352486 |
| NM_010556 | Il3   | Interleukin 3                 | NA | 14.34337152 | NA | NA | NA | NA | NA         | 14.5231272 | NA         | NA         | NA         |
| NM_008493 | Lep   | Leptin                        | NA | 19.7642197  | NA | NA | NA | NA | NA         | NA         | NA         | 20.4319226 | NA         |
| NM_010834 | Mstn  | Myostatin                     | NA | 15.6276996  | NA | NA | NA | NA | 16.3117006 | NA         | NA         | NA         | NA         |

Appendix Table 3: RNA array comparison between the normalized cycle threshold (Ct) values of 84 growth factor genes from UNIIR and 6 DPI samples

| GeneBank  | Symbol | Description                                 | logFC        | AveExpr     | t            | P.Value     | adj.P.Val   | Mock Irradiated |                |                | 6 Days         |                |                |
|-----------|--------|---------------------------------------------|--------------|-------------|--------------|-------------|-------------|-----------------|----------------|----------------|----------------|----------------|----------------|
|           |        |                                             |              |             |              |             |             | PAMM041 Plate1  | PAMM041 Plate2 | PAMM041 Plate3 | PAMM041 Plate1 | PAMM041 Plate2 | PAMM041 Plate3 |
| NM_011313 | S100a6 | S100 calcium binding protein A6 (calcyclin) | -1.451708267 | 1.070665867 | -6.131385346 | 9.90E-05    | 0.007724514 | 3.0630376       | 2.9841846      | 3.0664342      | 1.4843786      | 1.8758174      | 1.3983356      |
| NM_010514 | Igf2   | Insulin-like growth factor 2                | 0.9630383    | 10.18495798 | 4.683490261  | 0.001057654 | 0.041248493 | NA              | 9.7744106      | 9.8800972      | 10.7798226     | 10.7744304     | 10.8166236     |
| NM_007553 | Bmp2   | Bone morphogenetic protein 2                | 1.2290694    | 6.18948745  | 4.022594318  | 0.002300266 | 0.059806905 | 5.5538156       | 5.5971856      | 6.5640362      | 7.5247016      | 6.6874354      | 7.1901086      |
| NM_007558 | Bmp8a  | Bone morphogenetic protein 8a               | 0.949814067  | 7.019420283 | 3.816149521  | 0.003233789 | 0.063058894 | 6.4508076       | 6.0825956      | 6.8750462      | 7.6798226      | 7.1802404      | 7.3978286      |
| NM_007555 | Bmp5   | Bone morphogenetic protein 5                | 0.769220067  | 5.8139917   | 3.238727617  | 0.008591268 | 0.096098009 | 5.8051126       | 5.0782476      | 5.6098372      | 6.5349666      | 5.9312304      | 6.3346606      |
| NM_010272 | Gdf11  | Growth differentiation factor 11            | 1.010138133  | 9.077986527 | 3.316871865  | 0.00862418  | 0.096098009 | NA              | 8.6629276      | 8.5397232      | 9.0185216      | 9.8332594      | 9.9826096      |
| NM_010094 | Lefty1 | Left right determination factor 1           | 0.808546067  | 8.5232862   | 3.246210803  | 0.008481567 | 0.096098009 | 8.5418916       | 8.1262766      | 7.8896622      | 9.4566356      | 8.7300824      | 8.7967506      |
| NM_011577 | Tgfb1  | Transforming growth factor, beta 1          | 0.749847067  | 5.655222283 | 3.071322745  | 0.011463614 | 0.111770239 | 6.1353986       | 5.2322026      | 5.3020142      | 6.4019866      | 6.2182094      | 6.2989606      |
| NM_007950 | Ereg   | Epiregulin                                  | -1.0579206   | 4.985225867 | -2.757318959 | 0.01975643  | 0.154100157 | 7.8766046       | 6.4867596      | 6.9011292      | 5.6249286      | 6.6077654      | 5.8580376      |
| NM_010512 | Igf1   | Insulin-like growth factor 1                | -0.7452162   | 5.169512527 | -2.862254168 | 0.018168152 | 0.154100157 | NA              | 6.2589006      | 6.6587702      | 5.5104536      | 5.8429084      | 5.7874956      |
| NM_007554 | Bmp4   | Bone morphogenetic protein 4                | 0.507558733  | 5.530883367 | 2.460404586  | 0.033065571 | 0.166642512 | 5.6185626       | 5.2013416      | 5.4223182      | 5.8868996      | 5.9036954      | 5.9743036      |
| NM_007559 | Bmp8b  | Bone morphogenetic protein 8b               | 0.793470733  | 9.759587367 | 2.434298746  | 0.034592172 | 0.166642512 | 10.6243746      | 10.3265996     | 11.5622702     | 12.0737586     | 11.3642844     | 11.4556136     |
| NM_010198 | Fgf11  | Fibroblast growth factor 11                 | 0.788771067  | 8.684428533 | 2.406088468  | 0.036319522 | 0.166642512 | 8.3578896       | 7.9281556      | 8.0225572      | 8.8167476      | 8.3865424      | 9.4716256      |
| NM_010201 | Fgf14  | Fibroblast growth factor 14                 | -0.702054267 | 9.910584867 | -2.505085285 | 0.030604934 | 0.166642512 | 10.6179506      | 10.1717016     | 10.4141682     | 9.5277386      | 9.7654754      | 9.8044436      |
| NM_008361 | Il1b   | Interleukin 1 beta                          | 1.308394733  | 8.0152477   | 2.604041976  | 0.025780184 | 0.166642512 | 9.1403526       | 7.2444306      | 7.9650722      | 10.1529236     | 8.9653674      | 9.1567486      |
| NM_010564 | Inha   | Inhibin alpha                               | 1.0607068    | 11.07142589 | 2.586657311  | 0.028700018 | 0.166642512 | NA              | 10.7289126     | 10.4156122     | 12.1887256     | 11.4240184     | 11.2861636     |
| NM_008742 | Ntf3   | Neurotrophin 3                              | 0.772507067  | 8.184056367 | 2.435745656  | 0.03450578  | 0.166642512 | 8.0675716       | 7.1573656      | 7.9336382      | 8.6442026      | 8.1379654      | 8.6939286      |
| NM_011562 | Tdgf1  | Teratocarcinoma-derived growth factor 1     | -3.0840111   | 16.71278144 | -2.462667037 | 0.042042057 | 0.182182247 | 20.3083686      | 19.8610076     | NA             | NA             | 18.1051684     | 15.8961856     |
| NM_008176 | Cxcl1  | Chemokine (C-X-C motif) ligand 1            | -1.440399267 | 10.74938437 | -2.24253639  | 0.048118971 | 0.197541038 | 13.3940856      | 12.1514456     | 12.0477552     | 11.0468096     | 12.1189434     | 10.1063356     |
| NM_007557 | Bmp7   | Bone morphogenetic protein 7                | 0.4259504    | 7.304668867 | 2.175326024  | 0.053975943 | 0.200482073 | 7.9223216       | 7.3297156      | 7.7227622      | 8.0647806      | 8.0267554      | 8.1611146      |
| NM_008007 | Fgf3   | Fibroblast growth factor 3                  | -1.354020867 | 13.8697248  | -2.304101728 | 0.053297573 | 0.200482073 | 14.0930906      | 15.3398366     | 14.4587422     | 13.2765356     | NA             | NA             |
| NM_010427 | Hgf    | Hepatocyte growth factor                    | 0.611502133  | 7.523043345 | 2.106081934  | 0.063583371 | 0.225431951 | NA              | 7.6953736      | 8.4841492      | 8.7107716      | 8.9223204      | 8.4706986      |
| NM_008381 | Inhbb  | Inhibin beta-B                              | -0.7893416   | 9.220747617 | -2.024273987 | 0.069725874 | 0.226609089 | 10.5652196      | 9.9916646      | 9.9804662      | 9.7358436      | 9.1278434      | 9.3056386      |
| NM_177099 | Lefty2 | Left-right determination factor 2           | 1.7215696    | 17.96781106 | 2.302046357  | 0.066887954 | 0.226609089 | NA              | 18.6455386     | 17.5709482     | NA             | 19.5821354     | 20.0774906     |
| NM_021283 | Il4    | Interleukin 4                               | 1.532634467  | 12.0533028  | 1.956685817  | 0.081133671 | 0.253137053 | NA              | 11.4042666     | 11.4354522     | 12.4903596     | 14.3424154     | 12.0247066     |
| NM_008008 | Fgf7   | Fibroblast growth factor 7                  | 0.586207733  | 8.584481283 | 1.86812682   | 0.090499973 | 0.271499918 | 9.0568086       | 7.9820726      | 8.3035972      | 9.1073166      | 8.5546434      | 9.4391416      |
| NM_013518 | Fgf9   | Fibroblast growth factor 9                  | 0.4971894    | 11.1144902  | 1.821795472  | 0.09769076  | 0.278794636 | 10.4335766      | 10.5219786     | 10.4836972     | 11.0546566     | 10.5117104     | 11.3644536     |
| NM_010275 | Gdnf   | Glial cell line derived neurotrophic factor | 0.816932067  | 9.8568922   | 1.744830669  | 0.110802996 | 0.278794636 | 10.9995856      | 9.0196806      | 9.3310132      | 10.7966326     | 10.0623354     | 10.9421076     |
| NM_008351 | Il12a  | Interleukin 12A                             | 1.862559067  | 13.99847037 | 1.746723037  | 0.110462258 | 0.278794636 | 14.1011056      | 11.8219306     | 12.2802152     | 14.7733856     | 14.2066094     | 14.8109336     |
| NM_031199 | Tgfa   | Transforming growth factor alpha            | -0.295800933 | 7.220880617 | -1.764838439 | 0.107248261 | 0.278794636 | 7.4941846       | 7.3697266      | 7.4511782      | 7.2001316      | 6.9758984      | 7.2516566      |
| NM_009506 | Vegfc  | Vascular endothelial growth factor C        | 0.388122733  | 9.746123117 | 1.784461755  | 0.103862999 | 0.278794636 | 9.7035556       | 9.3963526      | 9.5647672      | 9.8407256      | 9.7883484      | 10.1999696     |
| NM_010200 | Fgf13  | Fibroblast growth factor 13                 | 0.414845067  | 8.592814033 | 1.579508529  | 0.144489001 | 0.346698088 | 8.8751626       | 8.5336686      | 8.8122092      | 9.0395006      | 8.8529884      | 9.5730866      |
| NM_008109 | Gdf5   | Growth differentiation factor 5             | 1.162918     | 14.50696255 | 2.170483779  | 0.14667996  | 0.346698088 | NA              | 14.3433456     | NA             | NA             | NA             | 15.5062636     |
| NM_023304 | Fgf22  | Fibroblast growth factor 22                 | -0.549406267 | 11.97653078 | -1.537224185 | 0.154446803 | 0.354319137 | 12.7242316      | 12.8126376     | 11.6822042     | 12.0632416     | 11.5783384     | 11.9292746     |
| NM_007556 | Bmp6   | Bone morphogenetic protein 6                | 0.4599864    | 8.844636783 | 1.516900649  | 0.159442943 | 0.355329986 | 9.3180386       | 8.3203026      | 8.9154822      | 8.8897776      | 9.1374064      | 9.9065986      |



Appendix Table 3: RNA array comparison between the normalized cycle threshold (Ct) values of 84 growth factor genes from UNIIR and 6 DPI samples

|           |        |                                                      |              |             |              |             |             |            |            |            |            |            |            |
|-----------|--------|------------------------------------------------------|--------------|-------------|--------------|-------------|-------------|------------|------------|------------|------------|------------|------------|
| NM_013609 | Ngf    | Nerve growth factor                                  | -0.600911367 | 12.25852698 | -1.453068993 | 0.179190452 | 0.37984801  | NA         | 12.8177566 | 13.0810692 | 12.1017856 | 11.9166754 | 13.0270436 |
| NM_009368 | Tgfb3  | Transforming growth factor, beta 3                   | -0.293378933 | 8.327371783 | -1.438021413 | 0.180184313 | 0.37984801  | 9.0148256  | 8.5242746  | 8.6612152  | 8.3942066  | 8.4942254  | 8.4317466  |
| NM_019400 | Rabep1 | Rabaptin, RAB GTPase binding effector protein 1      | 0.2530374    | 5.6005022   | 1.313813651  | 0.217490272 | 0.442705963 | 5.4960156  | 5.1741256  | 5.7678192  | 5.8098056  | 5.6188614  | 5.7684056  |
| NM_009362 | Tff1   | Trefoil factor 1                                     | -1.666677267 | 10.93600145 | -1.301996022 | 0.221352981 | 0.442705963 | 11.3064826 | 12.3240246 | 15.4074662 | 9.2151176  | 14.3230554 | 10.4997686 |
| NM_009367 | Tgfb2  | Transforming growth factor, beta 2                   | 0.3517384    | 8.8581462   | 1.272644029  | 0.231191882 | 0.450824169 | 9.2531686  | 8.7206876  | 8.9670022  | 9.8198056  | 8.8824324  | 9.2938356  |
| NM_021704 | Cxcl12 | Chemokine (C-X-C motif) ligand 12                    | 0.265815967  | 5.654867982 | 1.235683146  | 0.246963229 | 0.451117279 | NA         | 5.4173466  | 5.9094592  | 5.8385386  | 5.9292004  | 6.0199176  |
| NM_008002 | Fgf10  | Fibroblast growth factor 10                          | 0.580821067  | 9.978682783 | 1.201128737  | 0.256661392 | 0.451117279 | 11.2574046 | 9.5859006  | 9.8687822  | 10.7253126 | 10.4348524 | 11.2943856 |
| NM_031168 | Il6    | Interleukin 6                                        | 0.818356467  | 11.67697153 | 1.183548083  | 0.266043523 | 0.451117279 | NA         | 12.2604506 | 12.0721942 | 13.6840956 | 13.8308854 | 11.4390556 |
| NM_008380 | Inhba  | Inhibin beta-A                                       | -0.5885346   | 9.12383295  | -1.206632593 | 0.254624394 | 0.451117279 | 10.5211856 | 8.7307816  | 11.0667442 | 9.2995316  | 9.4440984  | 9.8094776  |
| NM_013598 | Kitl   | Kit ligand                                           | 0.530845067  | 3.753494867 | 1.177816181  | 0.265434036 | 0.451117279 | 3.7911376  | 3.2883876  | 3.6808272  | 4.2840666  | 3.5405324  | 4.5282886  |
| NM_198190 | Ntf5   | Neurotrophin 5                                       | -0.470437267 | 12.3053502  | -1.200335036 | 0.256956215 | 0.451117279 | 14.4148456 | 13.7942406 | 12.8395372 | 13.6030856 | 13.2137994 | 12.8204266 |
| NM_009755 | Bmp1   | Bone morphogenetic protein 1                         | 0.2876534    | 6.8769237   | 1.074785933  | 0.307065154 | 0.50959749  | 7.0603256  | 6.3236306  | 7.0829282  | 7.3096286  | 6.8446454  | 7.1755706  |
| NM_009263 | Spp1   | Secreted phosphoprotein 1                            | -0.9452706   | 7.8554667   | -1.021209439 | 0.330601298 | 0.537227109 | 9.9680006  | 8.4657956  | 9.1258262  | 7.6719986  | 6.8550944  | 10.1967176 |
| NM_009969 | Csf2   | Colony stimulating factor 2 (granulocyte-macrophage) | 0.430381733  | 11.28337253 | 0.946354283  | 0.365695219 | 0.582127084 | 11.0947516 | 9.8922346  | 11.6219092 | 11.7746856 | 10.9846794 | 11.1406756 |
| NM_010203 | Fgf5   | Fibroblast growth factor 5                           | -1.1936953   | 15.40041338 | -0.903200586 | 0.395347231 | 0.582572257 | 15.4313276 | 18.8508646 | 13.6415922 | 15.1108086 | 14.4509904 | NA         |
| NM_010205 | Fgf8   | Fibroblast growth factor 8                           | 0.589285067  | 15.13678162 | 0.880455845  | 0.398741352 | 0.582572257 | 14.4513626 | 14.0275456 | 16.5623042 | 14.8826856 | 16.3644554 | 15.5619266 |
| NM_010216 | Figf   | C-fos induced growth factor                          | 0.265052067  | 8.76661645  | 0.871632316  | 0.403319255 | 0.582572257 | 9.4802056  | 8.4658226  | 9.1185672  | 8.9482096  | 9.5535864  | 9.3579556  |
| NM_010784 | Mdk    | Midkine                                              | 0.236523067  | 7.14173445  | 0.887369887  | 0.395179403 | 0.582572257 | 7.2993646  | 6.7121356  | 7.3918062  | 7.4618416  | 6.9087254  | 7.7423086  |
| NM_011697 | Vegfb  | Vascular endothelial growth factor B                 | 0.175961067  | 7.4733892   | 0.884809132  | 0.396496055 | 0.582572257 | 7.3712026  | 7.5055296  | 6.9793652  | 7.2507166  | 7.4441144  | 7.6891496  |
| NM_009711 | Artn   | Artemin                                              | -0.194867933 | 9.52028395  | -0.75946723  | 0.464643417 | 0.624865285 | 10.2639236 | 9.6049026  | 9.9281242  | 9.2714256  | 9.9152904  | 10.0256306 |
| NM_007778 | Csf1   | Colony stimulating factor 1 (macrophage)             | 0.2280694    | 7.640046867 | 0.787591006  | 0.448725787 | 0.624865285 | 8.3771456  | 7.2941266  | 7.5068442  | 7.9031236  | 7.9736514  | 7.9855496  |
| NM_145741 | Gdf10  | Growth differentiation factor 10                     | 0.621077733  | 12.08812053 | 0.771619109  | 0.457721593 | 0.624865285 | 13.0936396 | 10.6253356 | 10.8201742 | 11.7014536 | 12.6307694 | 12.0701596 |
| NM_010554 | Il1a   | Interleukin 1 alpha                                  | 0.422967067  | 8.893557367 | 0.775192585  | 0.455698841 | 0.624865285 | 9.3563216  | 9.1697366  | 9.0616982  | 9.2061936  | 9.2905634  | 10.3599006 |
| NM_007540 | Bdnf   | Brain derived neurotrophic factor                    | -0.4310006   | 11.88260395 | -0.73015554  | 0.481613437 | 0.63670929  | 12.6153106 | 13.5828136 | 13.1313542 | 12.6869316 | 12.5842984 | 12.7652466 |
| NM_010197 | Fgf1   | Fibroblast growth factor 1                           | 0.190102733  | 8.064896117 | 0.584534819  | 0.5714735   | 0.736617424 | 8.6988466  | 7.4211386  | 8.2531592  | 8.0887406  | 8.1909234  | 8.6637886  |
| NM_008501 | Lif    | Leukemia inhibitory factor                           | 0.130923733  | 8.660766617 | 0.577448422  | 0.576072601 | 0.736617424 | 9.0229606  | 8.3931566  | 8.8827652  | 9.0072956  | 8.9438284  | 8.7405296  |
| NM_008371 | Il7    | Interleukin 7                                        | -0.135975367 | 8.0910868   | -0.558176284 | 0.589944368 | 0.742188076 | NA         | 8.3388656  | 7.9094442  | 8.2308096  | 7.6080954  | 8.1256336  |
| NM_010113 | Egf    | Epidermal growth factor                              | -0.166134933 | 10.77793162 | -0.458383847 | 0.656220548 | 0.812463535 | 11.1442206 | 10.8136886 | 11.2250072 | 11.1577716 | 10.5395234 | 10.9872166 |
| NM_013611 | Nodal  | Nodal                                                | -0.2529174   | 13.95672689 | -0.41319466  | 0.691374837 | 0.835246076 | NA         | 15.0232966 | 13.4918702 | 13.8549916 | 14.1543404 | NA         |
| NM_009505 | Vegfa  | Vascular endothelial growth factor A                 | -0.0905596   | 3.838946117 | -0.401834645 | 0.696038397 | 0.835246076 | 3.9847886  | 3.3746376  | 3.7957642  | 3.5178586  | 3.5448954  | 3.8207576  |
| NM_007445 | Amh    | Anti-Mullerian hormone                               | -0.3230326   | 17.11161137 | -0.351126097 | 0.732588194 | 0.852863867 | 15.5812986 | 18.2167106 | 19.0645092 | 17.4380716 | 16.6970154 | 17.7583336 |
| NM_010202 | Fgf4   | Fibroblast growth factor 4                           | 0.378545033  | 13.15846671 | 0.36394721   | 0.724057559 | 0.852863867 | 15.7587056 | 12.0835286 | 11.9845432 | 13.1673996 | 14.1408754 | NA         |
| NM_009971 | Csf3   | Colony stimulating factor 3 (granulocyte)            | -0.4849223   | 13.82481198 | -0.305042126 | 0.767069945 | 0.86850717  | 16.3707856 | 14.7968256 | 13.5958202 | NA         | 17.3785454 | 11.4938976 |
| NM_008003 | Fgf15  | Fibroblast growth factor 15                          | -0.2828566   | 15.90422212 | -0.302516618 | 0.768294804 | 0.86850717  | 18.8327256 | 15.2081336 | 18.7683662 | 16.9404786 | 16.3572404 | 18.6629366 |
| NM_008005 | Fgf18  | Fibroblast growth factor 18                          | 0.1139524    | 12.19765912 | 0.253423531  | 0.80494049  | 0.896933689 | 13.3401656 | 12.8539406 | 12.0933502 | 13.1929956 | 11.8461584 | 13.5901596 |
| NM_008004 | Fgf17  | Fibroblast growth factor 17                          | 0.1634623    | 16.06200877 | 0.198663496  | 0.851623537 | 0.909953916 | NA         | NA         | 16.0067922 | 15.6676786 | 16.6728304 | NA         |
| NM_008360 | Il18   | Interleukin 18                                       | 0.0546264    | 1.433462283 | 0.198755685  | 0.846332332 | 0.909953916 | 1.3350986  | 0.5841806  | 1.0940462  | 0.9315356  | 0.9711224  | 1.2745466  |

Appendix Table 3: RNA array comparison between the normalized cycle threshold (Ct) values of 84 growth factor genes from UNIIR and 6 DPI samples

|           |       |                                       |              |             |              |             |             |            |            |            |            |            |            |
|-----------|-------|---------------------------------------|--------------|-------------|--------------|-------------|-------------|------------|------------|------------|------------|------------|------------|
| NM_008808 | Pdgfa | Platelet derived growth factor, alpha | -0.056076267 | 6.65306195  | -0.192123806 | 0.851389868 | 0.909953916 | 7.1911226  | 6.3190366  | 6.3524622  | 6.8523856  | 6.0573784  | 6.7846286  |
| NM_008827 | Pgf   | Placental growth factor               | -0.0539276   | 9.671740617 | -0.147271693 | 0.885767837 | 0.93364718  | 10.5762326 | 9.6847136  | 9.9495492  | 10.8322756 | 9.9708834  | 9.2455536  |
| NM_173404 | Bmp3  | Bone morphogenetic protein 3          | 0.024450067  | 6.965816283 | 0.074684889  | 0.941899754 | 0.979575744 | 6.9570366  | 6.1405106  | 7.2540622  | 6.8522316  | 6.6132294  | 6.9594986  |
| NM_008006 | Fgf2  | Fibroblast growth factor 2            | 0.013684067  | 8.78776095  | 0.039068933  | 0.969584263 | 0.995099638 | 10.1883416 | 9.2035826  | 9.1711342  | 9.6422596  | 9.1029214  | 9.8589296  |
| NM_008350 | Il11  | Interleukin 11                        | 0.001883067  | 11.42749745 | 0.003465724  | 0.997301136 | 0.997301136 | 13.4814356 | 12.0462936 | 11.6978712 | 12.8198886 | 12.2292994 | 12.1820616 |
| NM_053009 | Zfp91 | Zinc finger protein 91                | 0.0029204    | 2.9857062   | 0.015819081  | 0.987681739 | 0.997301136 | 3.1982956  | 2.6738356  | 2.9852802  | 2.8793976  | 3.0859634  | 2.9008116  |
| NM_009756 | Bmp10 | Bone morphogenetic protein 10         | NA           | 14.3355976  | NA           | NA          | NA          | NA         | NA         | NA         | NA         | 14.4557354 | NA         |
| NM_010204 | Fgf6  | Fibroblast growth factor 6            | NA           | 17.3500847  | NA           | NA          | NA          | NA         | NA         | NA         | NA         | NA         | 14.7301396 |
| NM_008366 | Il2   | Interleukin 2                         | NA           | 14.61257653 | NA           | NA          | NA          | NA         | NA         | 14.4339402 | NA         | NA         | NA         |
| NM_010556 | Il3   | Interleukin 3                         | NA           | 14.34337152 | NA           | NA          | NA          | NA         | NA         | 14.5231272 | NA         | 12.7595154 | NA         |
| NM_008493 | Lep   | Leptin                                | NA           | 19.7642197  | NA           | NA          | NA          | NA         | NA         | NA         | NA         | NA         | NA         |
| NM_010834 | Mstn  | Myostatin                             | NA           | 15.6276996  | NA           | NA          | NA          | NA         | 16.3117006 | NA         | NA         | NA         | 14.9436986 |
